# Supplementary material for: Annual layering in the NGRIP ice core during the Eemian
Source: Copernicus journal article supplement (doi:10.5194/cp-7-1427-2011), 2011-12-16

FIGURE S1. Measured profiles for sample 'A'. Units and annual layer counting as in Fig. 5.

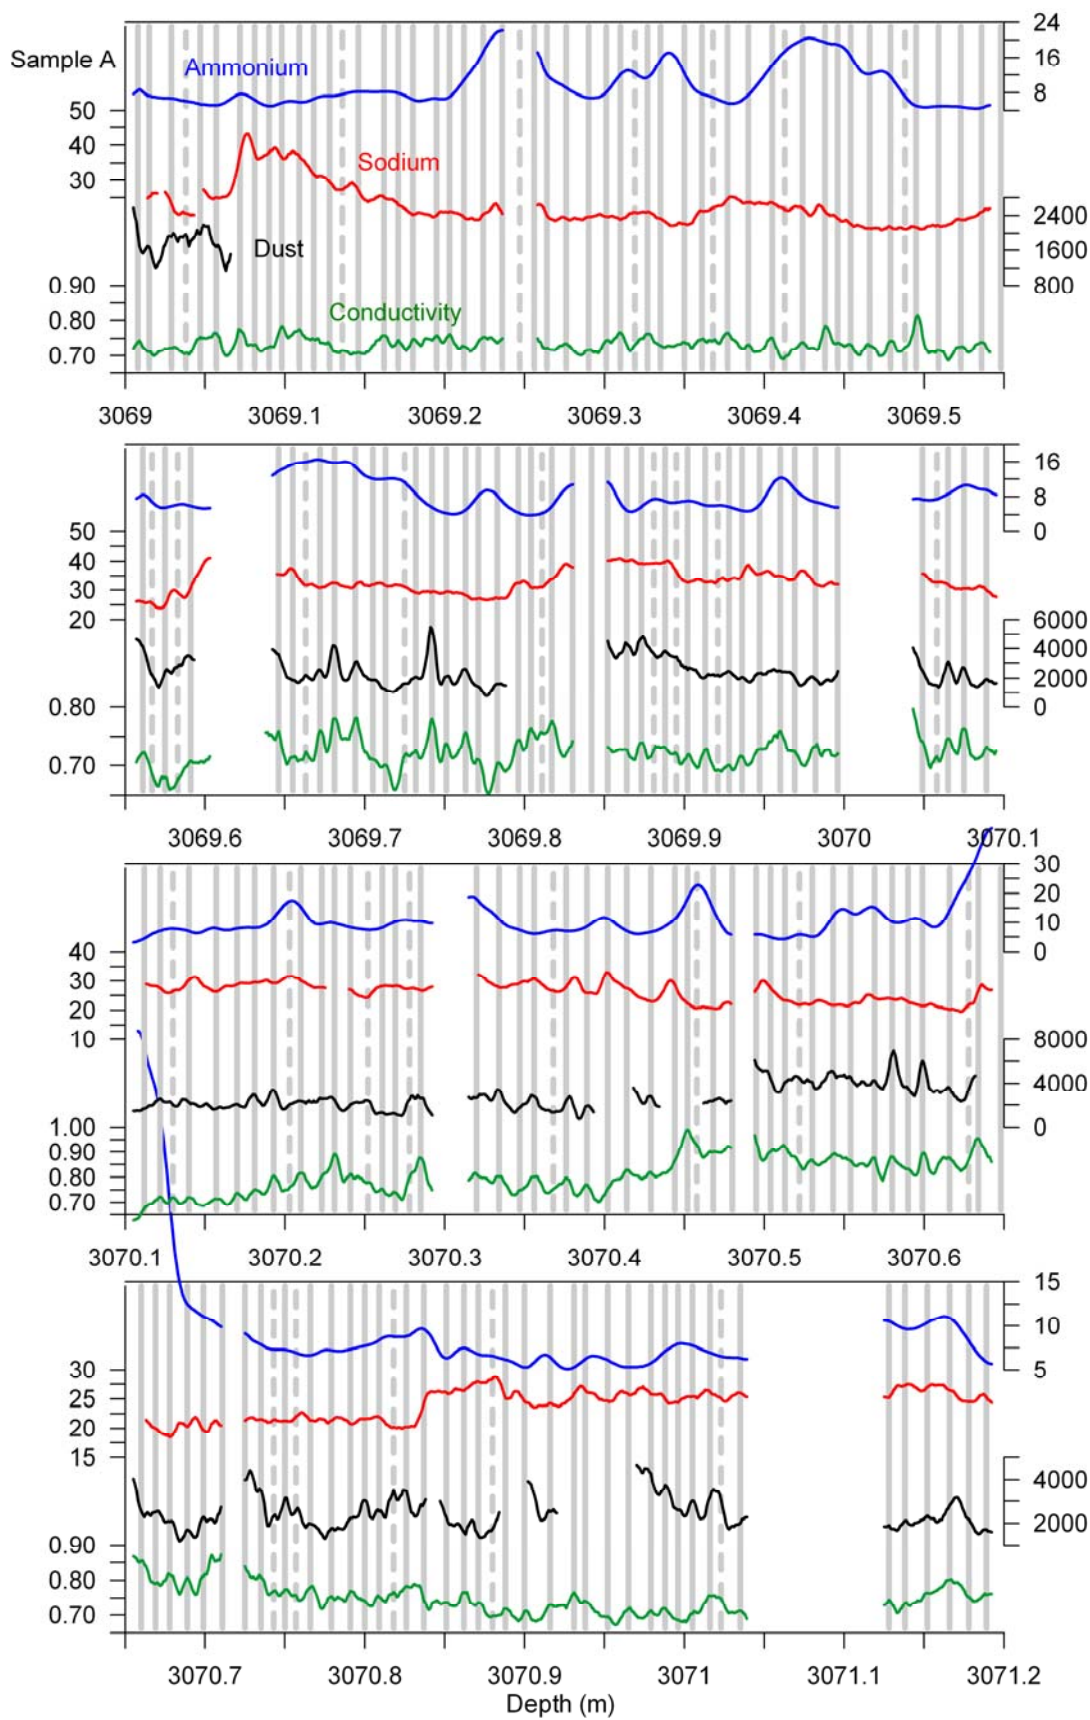

FIGURE S2. Measured profiles for sample 'B'. Units and annual layer counting as in Fig. 5.

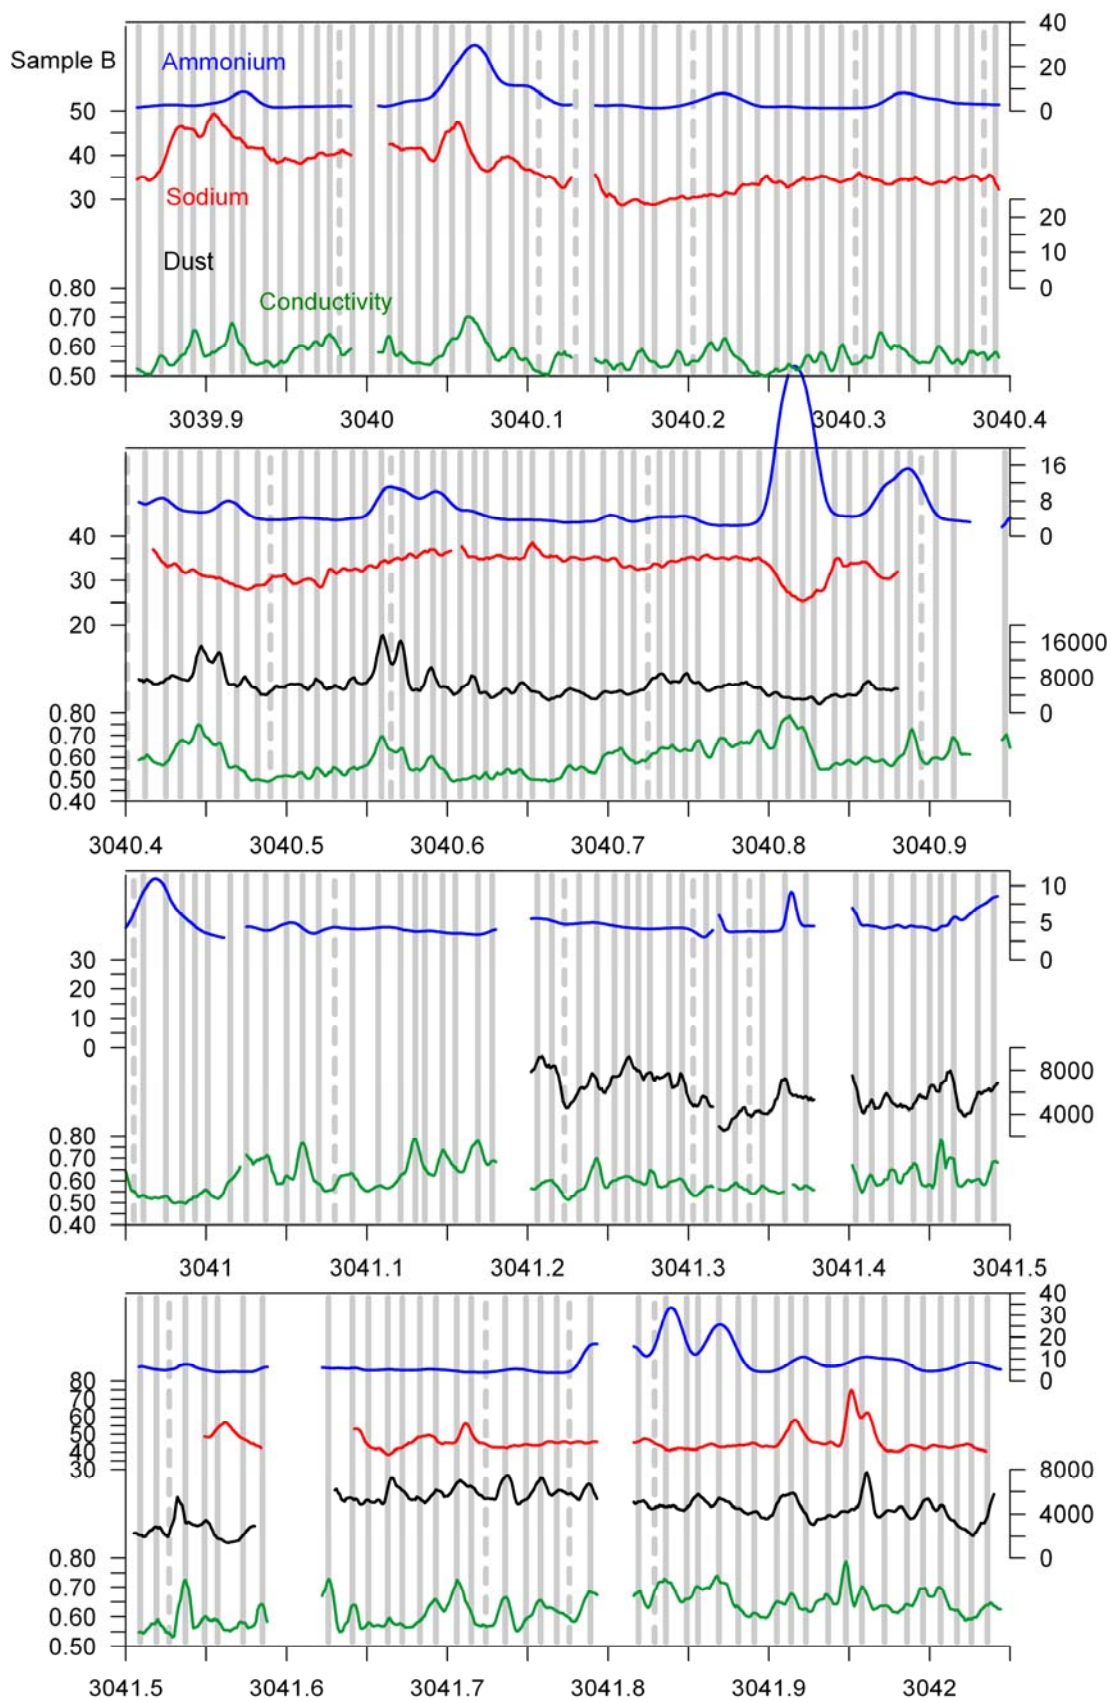

FIGURE S3. Measured profiles for sample 'C'. Units and annual layer counting as in Fig. 5.

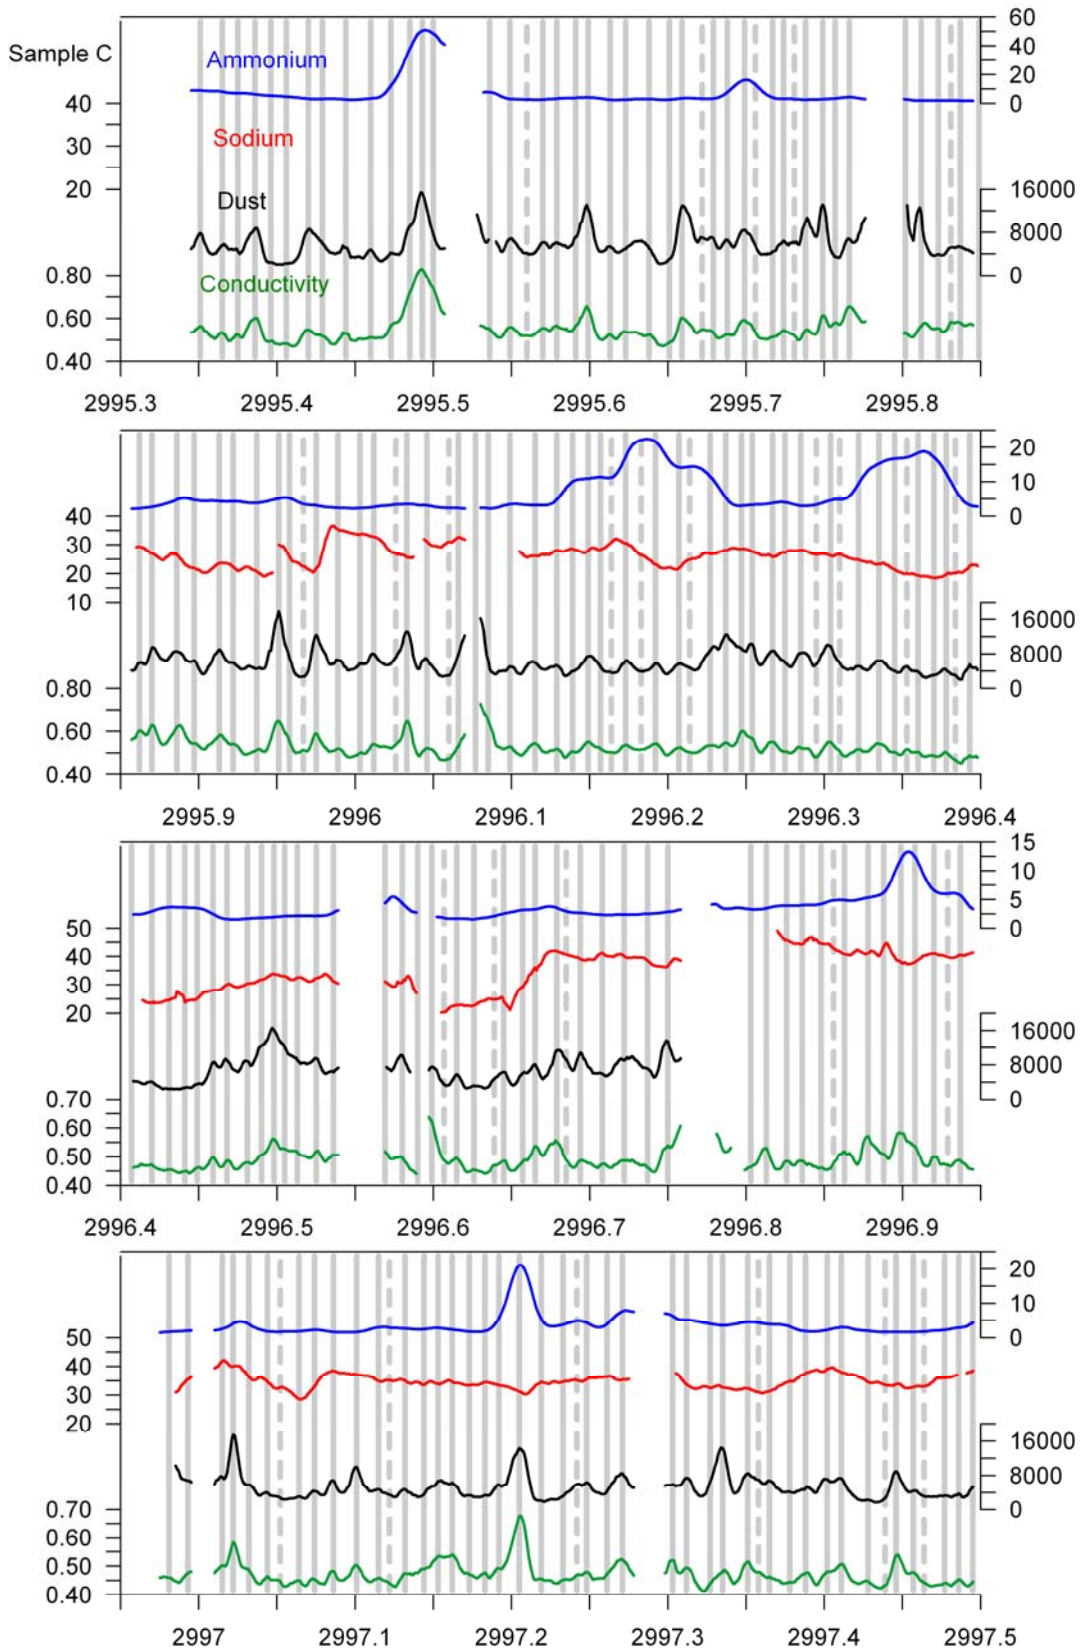

Supplement: Supplementary file 1 [file cp-7-1427-2011-supplement.pdf]
